# Supplementary material for: Two solvent-dependent Al16 nanorings: design, synthesis and nonlinear optical limiting behavior
Source: Royal Society of Chemistry journal article supplement (doi:10.1039/d3qi02008h), 2023-11-15
Supplement: d3qi02008h1.pdf [file d3qi02008h1.pdf]

# Supporting Information

## Two solvent-dependent Al<sub>16</sub> nanorings: design synthesis and nonlinear optical limiting behavior

San-Tai Wang, ‡<sup>a,b</sup> Xiao Qi, ‡<sup>a,b</sup> Ran-Qi Chen, <sup>a</sup> Wei-Hui Fang <sup>\*a</sup> and Jian Zhang <sup>\*a</sup>

<sup>a</sup>State Key Laboratory of Structural Chemistry, Fujian Institute of Research on the Structure of Matter, Chinese Academy of Sciences, Fuzhou, Fujian 350002, P.R. China.

<sup>b</sup>University of Chinese Academy of Sciences, Beijing, 100049, P.R. China.

Email: fwh@fjirsm.ac.cn

‡These authors contributed equally.

### Table of content

|                                                                |     |
|----------------------------------------------------------------|-----|
| <b>Materials and Instrumentation</b> .....                     | S2  |
| <b>Supporting Figures</b> .....                                | S3  |
| The Structure of AIOC-134 and AIOC-135 .....                   | S3  |
| Series Characterization of AIOC-134 and AIOC-135 .....         | S4  |
| Photoluminescence Section .....                                | S8  |
| Third-order Nonlinear Section.....                             | S10 |
| <b>Supporting Tables</b> .....                                 | S11 |
| Crystallographic Data .....                                    | S11 |
| Bond Lengths .....                                             | S12 |
| Supramolecular Force Table Statistics .....                    | S12 |
| BVS Analysis.....                                              | S14 |
| (AIOCs@PDMS) Information and Third-order Test Parameters ..... | S15 |
| Supplement of Representative NLO Material .....                | S16 |
| <b>References</b> .....                                        | S18 |

## Materials and Instrumentation

All the reagents and solvents employed were purchased commercially and used as received without further treatment. Aluminum isopropoxide ( $\text{Al}(\text{O}^i\text{Pr})_3$ ) was purchased from Aladdin Chemical Reagent Shanghai, while 2-naphthoic acid was purchased from Adamas-beta. Hexamethylene tetramine, phenol ( $\geq 99.0\%$ ), 1-propanol ( $\geq 99.5\%$ ), 1, 4-dioxane ( $\geq 99.5\%$ ), methylamine solution in alcohol (27%~32%) and N, N-dimethylformamide (DMF) ( $\geq 99.5\%$ ) were acquired from Sinopharm Chemical Reagent Beijing.

After fully grinding the crystals, they were made into transparent round slices in a fully automatic tablet press for testing. The **Fourier transform infrared spectroscopy (FT-IR)** data were collected on a PerkinElmer Spectrum 100 FT-IR Spectrometer over a range  $400\text{-}4000\text{ cm}^{-1}$ .

Single crystal samples of **AIOC-134** to **AIOC-135** were grinded in a mortar and sieved with a 200 molybdenum sieve and then used for testing. The **powder X-ray diffraction (PXRD)** data were collected on a Rigaku Mini Flex II diffractometer using  $\text{Cu-K}\alpha$  radiation ( $\lambda = 1.54056\text{ \AA}$ ) under ambient conditions. Molecular modeling was carried out using Reflex Plus, a module implemented in Materials Studio (version 4.4) by Accelrys Inc. The initial structures were constructed piecewise starting with a monoclinic cell with space group  $C2/c$  for **AIOC-134**, and a tetragonal cell with space group  $P4_2/n$  for **AIOC-135**. For **AIOC-134** and **AIOC-135**, the Tomandl Pseudo-Voigt function was used for whole profile fitting and the Berrar-Baldinozzi function was used for asymmetry correction during the refinement processes.

The **UV-vis diffuse reflection** data were recorded at room temperature using a powder sample with  $\text{BaSO}_4$  as a standard (100% reflectance) on a PerkinElmer Lambda-950 UV spectrophotometer and scanned at 200-800 nm. The absorption data are calculated from the Kubelka-Munk function,  $(F(R) = (1-R)^2/2R)$ , where R representing the reflectance.

The **thermogravimetric analyses (TGA)** were performed on a Mettler Toledo TGA/SDTA 851e analyzer in a nitrogen atmosphere with a heating rate of  $10\text{ }^\circ\text{C}/\text{min}$ .

The **energy dispersive spectroscopy (EDS)** analyses of single cleaned crystal were performed on a JEOL JSM6700F field-emission scanning electron microscope equipped with an Oxford INCA system.

## Supporting Figures

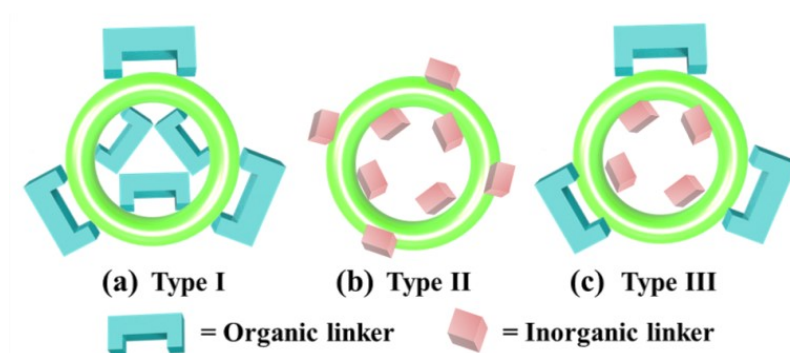

Scheme S1 Three connection types in cyclic compounds.

## The Structure of AIOC-134 and AIOC-135 Rings

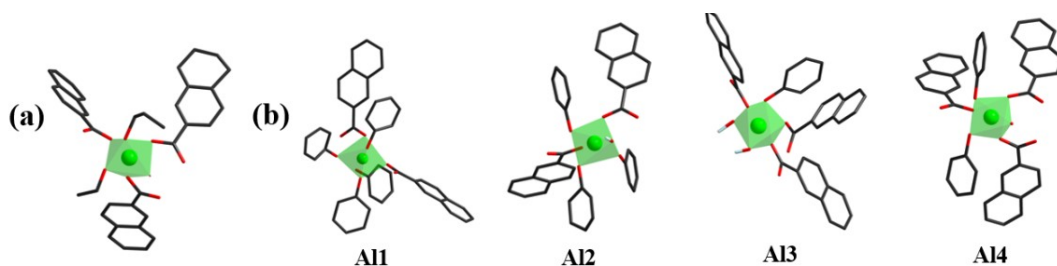

Figure S1 Coordination environment of  $\text{Al}^{3+}$  ions in AIOC-134 (a) and AIOC-135 (b). Color code: Al, green; O, red; C, black.

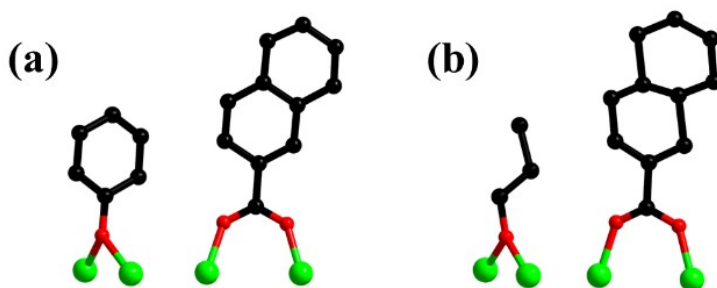

Figure S2 Ligand coordination mode of AIOC-134 (a) and AIOC-135 (b). Color code: Al, green; O, red; C, black.

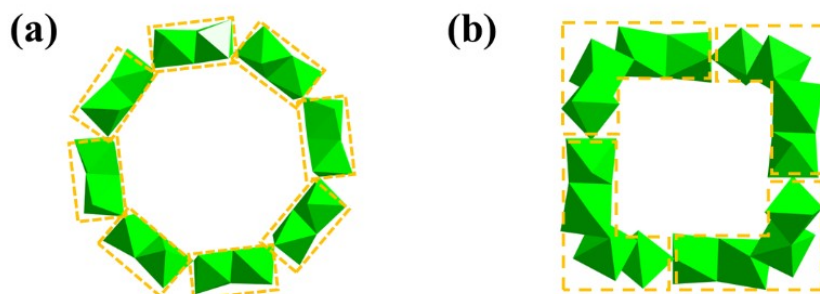

Figure S3 Connection mode of  $\text{Al}_2$  dimers (a) and  $\text{Al}_4$  dimers (b) through vertex sharing mode.

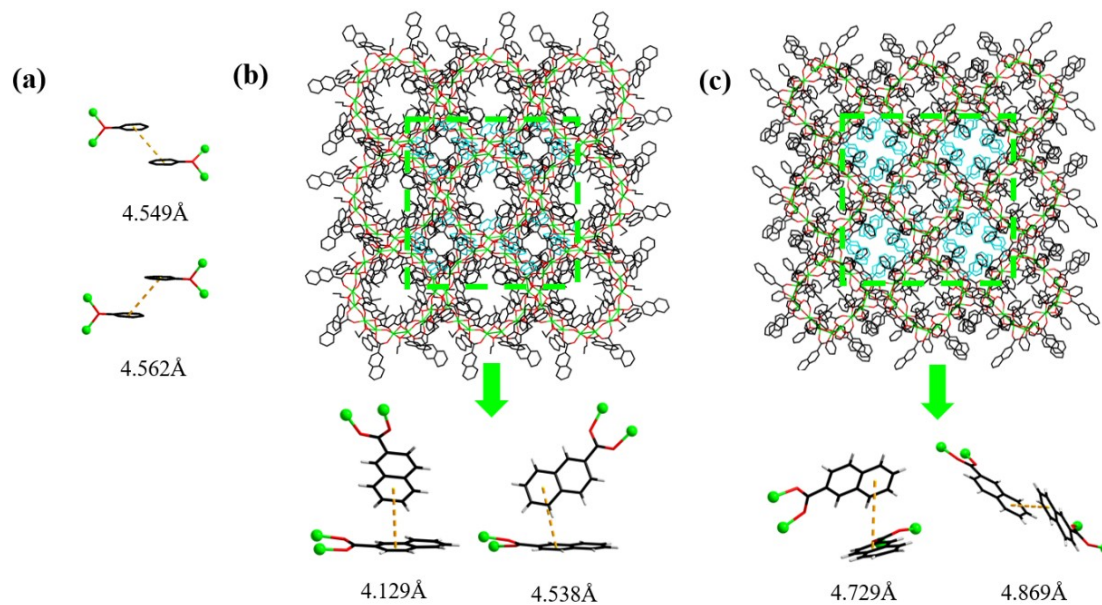

**Figure S4** (a) The intramolecular  $\pi \cdots \pi$  stacking interaction of AIOC-135. (b) The intermolecular  $\pi \cdots \pi$  stacking interaction of AIOC-134. (c) The intermolecular  $\pi \cdots \pi$  stacking interaction of AIOC-135. Color code: Al, green; O, red; C, black; C with  $\pi \cdots \pi$  stacking interaction, blue.

#### Series Characterization of AIOC-134 and AIOC-135 Molecular Rings

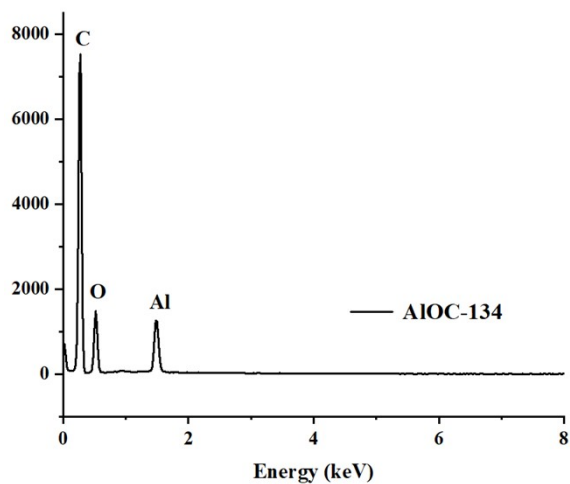

**Figure S5** The EDS spectrum of compound AIOC-134.

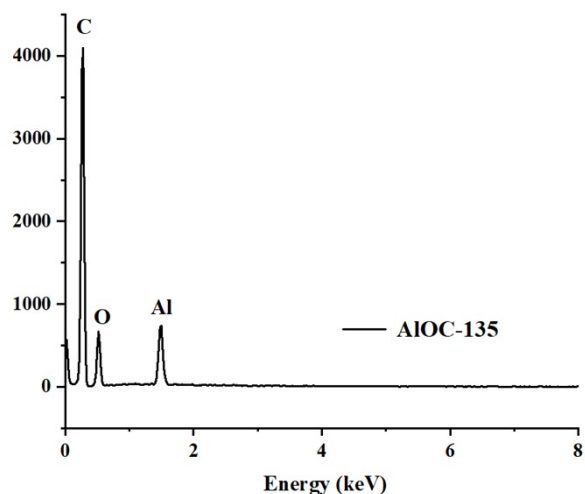

**Figure S6** The EDS spectrum of compound AIOC-135.

Discussion for EDS spectra: The elemental composition of AIOC-134 and AIOC-135 can be obtained from the EDS spectrum (Al, C and O), in which show similar proportions of elements.

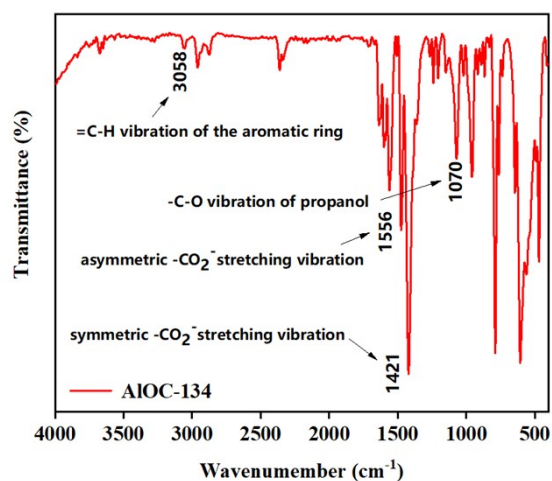

**Figure S7** FT-IR spectra of AIOC-134.

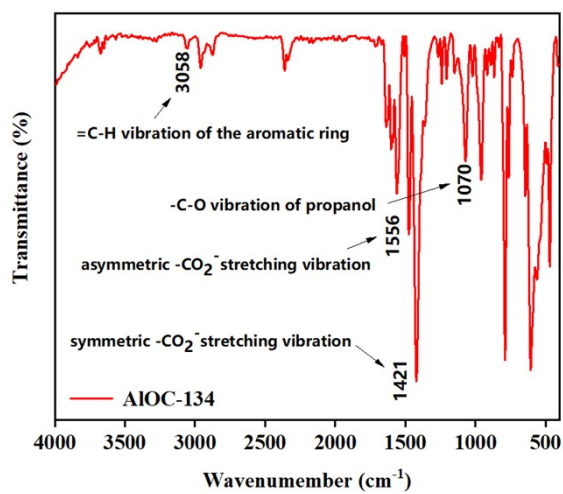

**Figure S8** FT-IR spectra of AIOC-135.

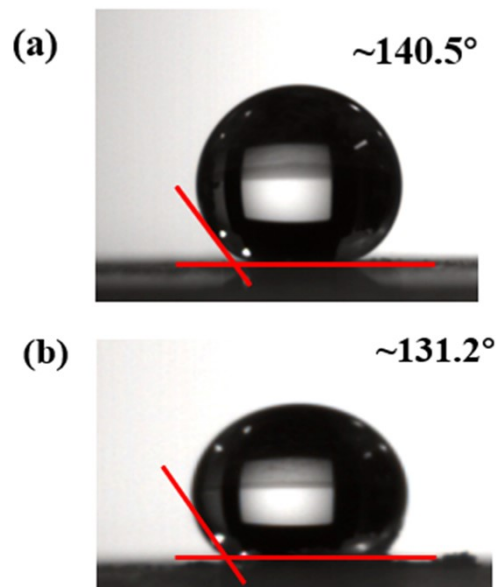

**Figure S9** The contact angles of water droplet of AIOC-134 (a) and AIOC-135 (b).

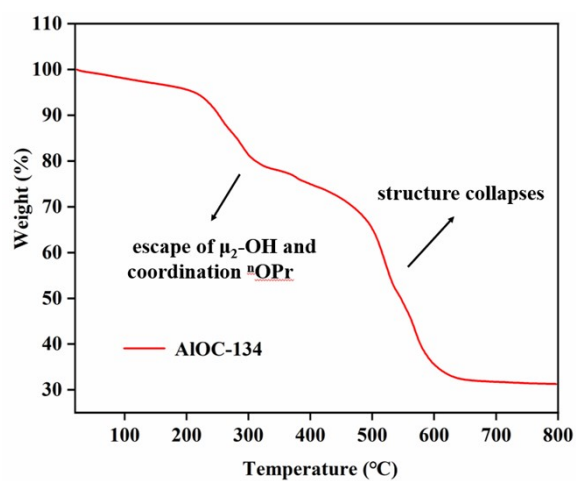

**Figure S10** The TGA plot of AIOC-134.

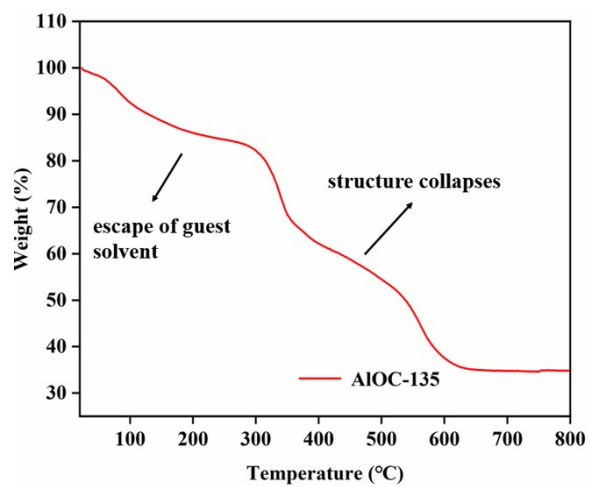

**Figure S11** The TGA plot of AIOC-135.

Discussion for TGA curve: The thermal stability of **AIOC-134** and **AIOC-135** was investigated in  $N_2$  atmosphere up to  $800\text{ }^\circ\text{C}$  with a heating rate of  $10\text{ K min}^{-1}$ . The thermal stability of the two compounds is slightly different. For **AIOC-134**, the first stage of weightlessness may be due to the escape of  $\mu_2\text{-OH}$  and the coordination  $^n\text{OPr}$ , further collapses when the temperature is heated to  $500\text{ }^\circ\text{C}$ . For **AIOC-135**, the early thermogravimetric loss may be caused by the escape of guest solvents. At  $600\text{ }^\circ\text{C}$ , the two compounds completely collapse into  $\text{Al}_2\text{O}_3$ .

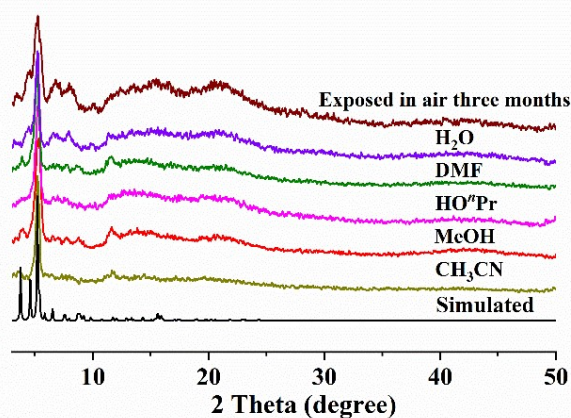

**Figure S12** The PXRD patterns of **AIOC-134** in different organic solvents at room temperature for 24 hours.

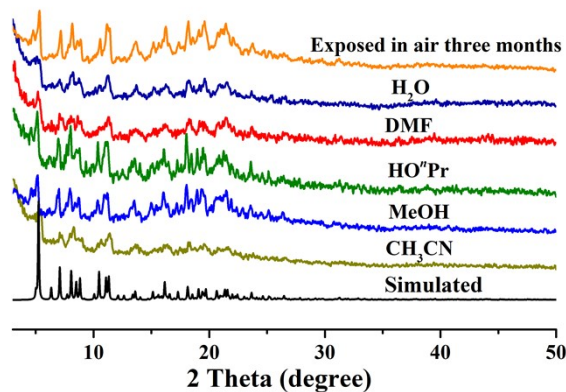

**Figure S13** The PXRD patterns of **AIOC-135** in different organic solvents at room temperature for 24 hours.

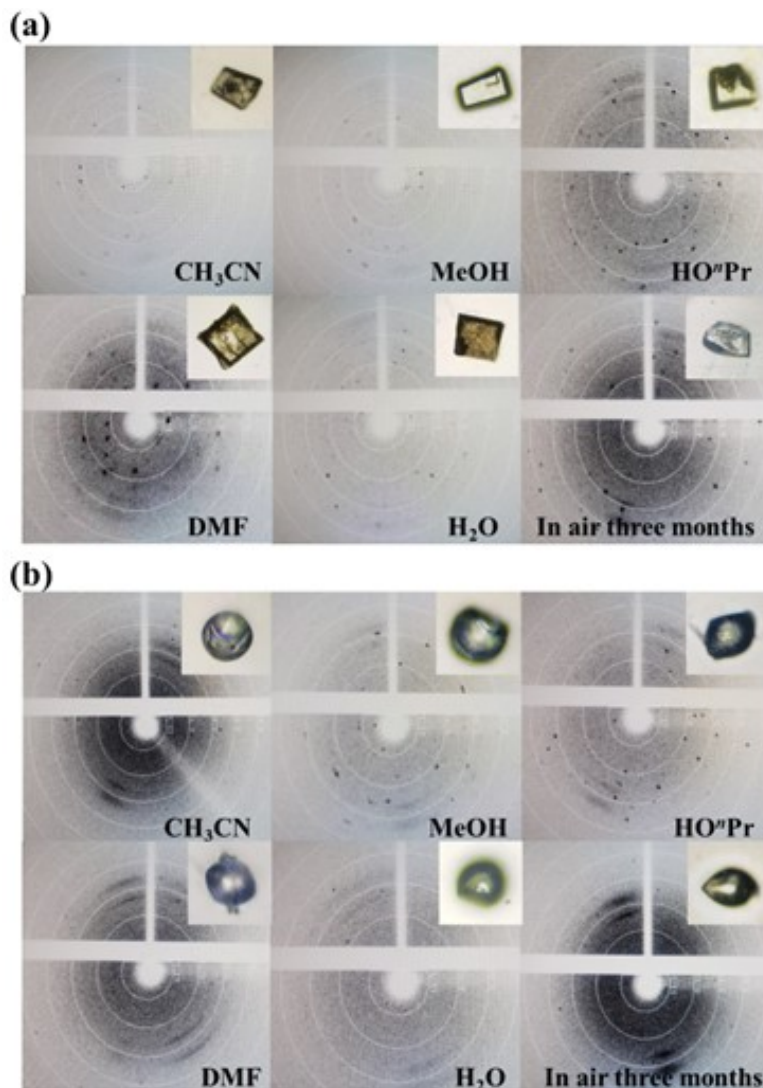

**Figure S14** The diffraction images of AIOC-134 (a) and AIOC-135 (b) were placed in air for 3 months and soaked in solvent for 3 days (insert is the corresponding single crystal morphology).

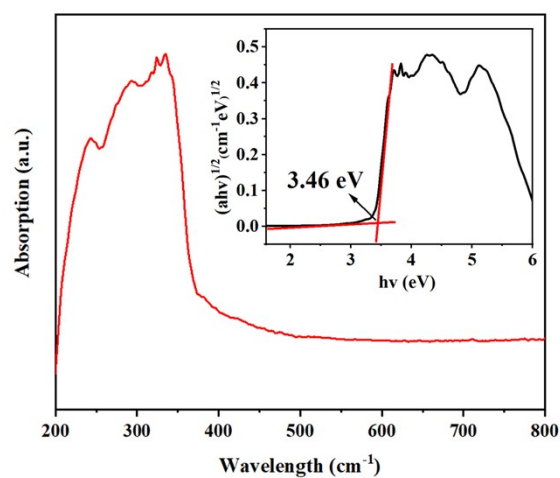

**Figure S15** The UV-vis diffuse reflectance spectra of AIOC-134 (inset is the band gap).



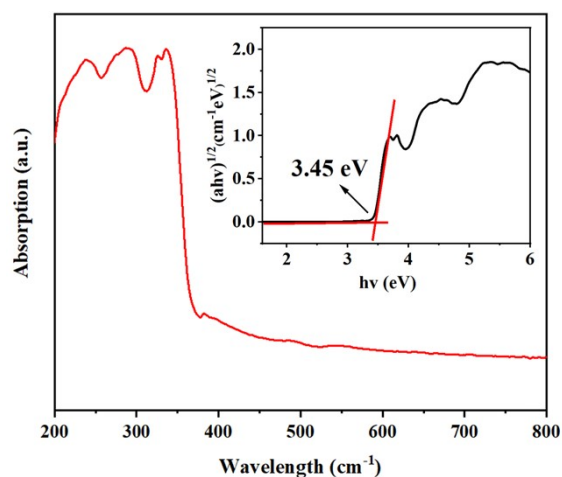

**Figure S16** The UV-vis diffuse reflectance spectra of **AIOC-135** (inset is the band gap).

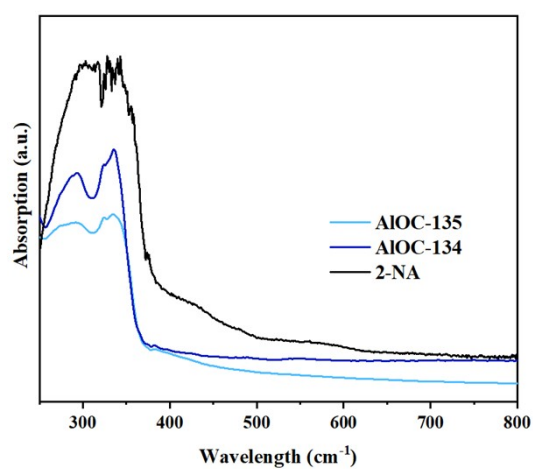

**Figure S17** The UV-vis diffuse reflectance spectra of **AIOC-134**, **AIOC-135** and **2-NA**. The absorption peaks of **AIOC-134** and **AIOC-135** are slightly red-shifted compared to the **2-NA** ligands.

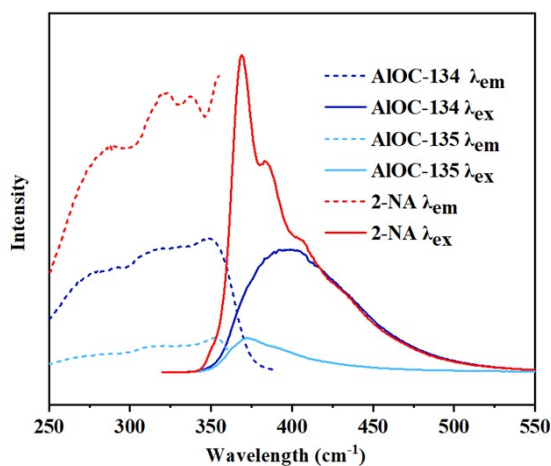

**Figure S18** Room-temperature photoluminescence spectra of **AIOC-134**, **AIOC-135** and **2-NA** ( $\lambda_{em}$  is measured under excitation with  $\lambda_{ex}=300$  nm).

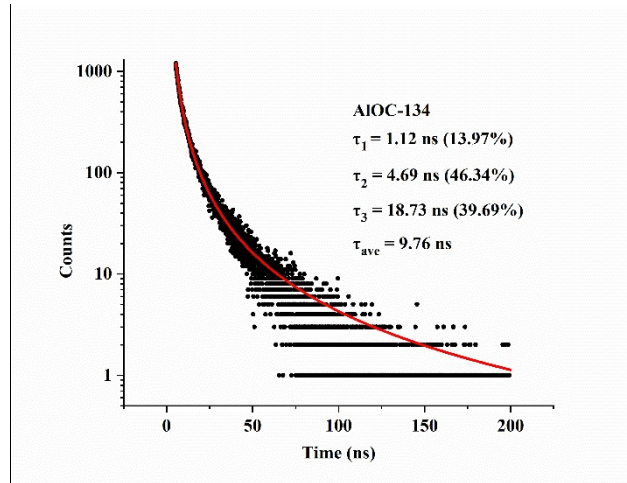

Figure S19 The time-resolved PL decay curve AIOC-134.

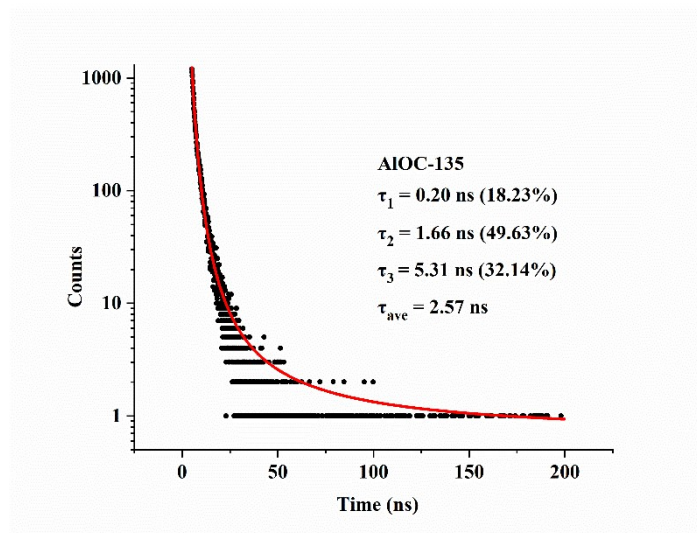

Figure S20 The time-resolved PL decay curve AIOC-135.

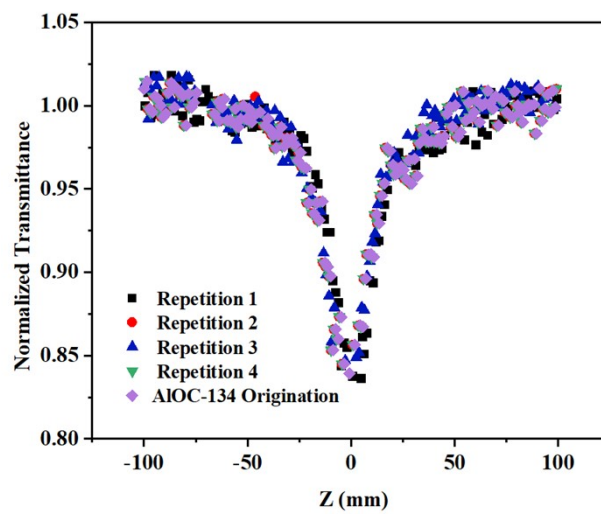

Figure S21 The repeatability of third-order NLO responses for AIOC-134.

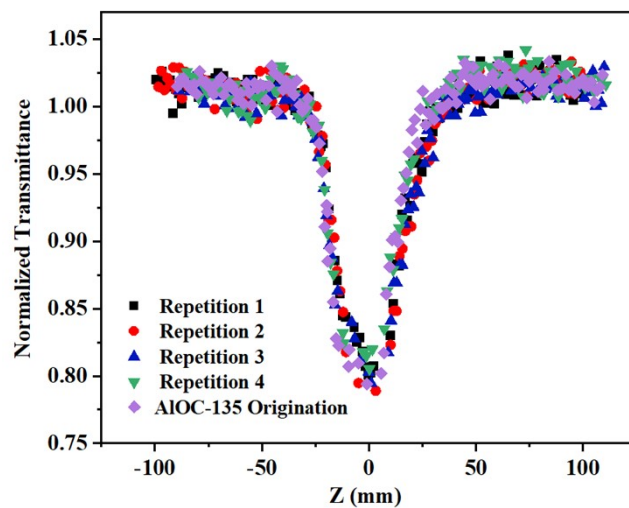

**Figure S22** The repeatability of third-order NLO responses for AIOC-135.

## Supporting Tables

### Crystallographic Data

Table S1 Crystallographic data and structural refinements.

| Identification code                        | AIOC-134                                                           | AIOC-135                                                           |
|--------------------------------------------|--------------------------------------------------------------------|--------------------------------------------------------------------|
| CCDC Nos.                                  | 2289659                                                            | 2289660                                                            |
| Empirical formula                          | C <sub>312</sub> H <sub>288</sub> Al <sub>16</sub> O <sub>72</sub> | C <sub>340</sub> H <sub>248</sub> Al <sub>16</sub> O <sub>68</sub> |
| Formula weight                             | 5621.09                                                            | 14188.3(4)                                                         |
| Temperature/K                              | 300                                                                | 293                                                                |
| Crystal system                             | monoclinic                                                         | tetragonal                                                         |
| Space group                                | C2/c                                                               | P4 <sub>2</sub> /n                                                 |
| <i>a</i> /Å                                | 33.3623(8)                                                         | 24.8708(2)                                                         |
| <i>b</i> /Å                                | 34.9963(9)                                                         | 24.8708(2)                                                         |
| <i>c</i> /Å                                | 34.0895(9)                                                         | 22.9377(6)                                                         |
| $\alpha$ /°                                | 90                                                                 | 90(3)                                                              |
| $\beta$ /°                                 | 90.857(2)                                                          | 90(3)                                                              |
| $\gamma$ /°                                | 90                                                                 | 90(3)                                                              |
| <i>V</i> olume/Å <sup>3</sup>              | 39797.0(18)                                                        | 14184.3(4)                                                         |
| <i>Z</i>                                   | 4                                                                  | 2                                                                  |
| $\rho_{\text{calc}}$ g/cm <sup>-3</sup>    | 0.938                                                              | 1.370                                                              |
| $\mu$ /mm <sup>-1</sup>                    | 0.552                                                              | 0.786                                                              |
| F(000)                                     | 117766.0                                                           | 6080.0                                                             |
| Radiation                                  | GaK $\alpha$ ( $\lambda$ =1.3405)                                  | GaK $\alpha$ ( $\lambda$ =1.3405)                                  |
| 2 $\theta$ range for data collection/°     | 4.256 to 120.078                                                   | 4.376 to 102.090                                                   |
| Reflections collected                      | 81140                                                              | 116377                                                             |
| Independent reflections                    | 40012[R <sub>int</sub> =0.0446,<br>R <sub>sigma</sub> =0.0602]     | 40012[R <sub>int</sub> =0.0866,<br>R <sub>sigma</sub> =0.0449]     |
| Data/restraints/parameters                 | 40012/187/1760                                                     | 16286/144/958                                                      |
| Goodness-of-fit on F <sup>2</sup>          | 1.105                                                              | 1.169                                                              |
| Final R indexes [I>2 $\sigma$ (I)]         | <i>R</i> <sub>1</sub> = 0.0986<br><i>wR</i> <sub>2</sub> = 0.3331  | <i>R</i> <sub>1</sub> = 0.0978<br><i>wR</i> <sub>2</sub> = 0.3386  |
| Final R indexes [all data]                 | <i>R</i> <sub>1</sub> = 0.1201<br><i>wR</i> <sub>2</sub> = 0.3546  | <i>R</i> <sub>1</sub> = 0.1568<br><i>wR</i> <sub>2</sub> = 0.3524  |
| Largest diff. peak/hole /e Å <sup>-3</sup> | 1.051/-0.501                                                       | 0.942/-0.590                                                       |

### Bond Lengths of AIOC-134 and AIOC-135

**Table S2** Bond lengths [Å] for **AIOC-134** and **AIOC-135**.

| Bond lengths [Å] for <b>AIOC-134</b> |          |           |          |           |          |           |          |
|--------------------------------------|----------|-----------|----------|-----------|----------|-----------|----------|
| Al01-O09                             | 1.862(3) | Al02-O0C  | 1.880(2) | Al03-O09  | 1.847(3) | Al04-O0B  | 1.875(3) |
| Al01-O0C                             | 1.875(3) | Al02-O0F  | 1.913(3) | Al03-O0A  | 1.853(3) | Al04-O0D  | 1.865(3) |
| Al01-O0E                             | 1.882(3) | Al02-O0G  | 1.901(3) | Al03-O0J  | 1.873(3) | Al04-O0H  | 1.855(3) |
| Al01-O0K                             | 1.915(3) | Al02-O0M  | 1.945(3) | Al03-O0X  | 1.946(3) | Al04-O0S  | 1.888(3) |
| Al01-O0N                             | 1.907(3) | Al02-O0P  | 1.859(3) | Al03-O0Z  | 1.898(3) | Al04-O0Y  | 1.947(3) |
| Al01-O0P                             | 1.872(3) | Al02-O0Q  | 1.853(3) | Al03-O10  | 1.927(3) | Al04-O11  | 1.929(3) |
| Al05-O0H                             | 1.860(3) | Al06-O0I  | 1.867(3) | Al07-O0B  | 1.883(3) | Al08-O0A  | 1.868(3) |
| Al05-O0I                             | 1.865(3) | Al06-O0L  | 1.875(3) | Al07-O0D  | 1.872(3) | Al08-O0J  | 1.873(3) |
| Al05-O0L                             | 1.884(3) | Al06-O0O  | 1.895(3) | Al07-O0Q  | 1.855(3) | Al08-O0U  | 1.863(3) |
| Al05-O0T                             | 1.885(3) | Al06-O0U  | 1.844(3) | Al07-O0R  | 1.886(3) | Al08-O0V  | 1.898(3) |
| Al05-O0W                             | 1.913(3) | Al06-O12  | 1.912(3) | Al07-O015 | 1.924(3) | Al08-O014 | 1.913(3) |
| Al01-O005                            | 1.884(2) | Al02-O005 | 1.890(3) | Al03-O007 | 1.841(3) | Al04-O008 | 1.902(3) |
| Bond lengths [Å] for <b>AIOC-135</b> |          |           |          |           |          |           |          |
| Al01-O006                            | 1.923(3) | Al02-O006 | 1.910(3) | Al03-O009 | 1.955(3) | Al04-O00D | 1.838(3) |
| Al01-O008                            | 1.913(3) | Al02-O007 | 1.864(3) | Al03-O00D | 1.840(3) | Al04-O00E | 1.909(3) |
| Al01-O00A                            | 1.908(3) | Al02-O009 | 1.913(3) | Al03-O00F | 1.904(3) | Al04-O00J | 1.909(4) |
| Al01-O00C                            | 1.897(4) | Al02-O00B | 1.899(3) | Al03-O00G | 1.935(3) | Al04-O00K | 1.853(3) |
| Al01-O00E                            | 1.891(3) | Al02-O00H | 1.898(3) | Al03-O00I | 1.895(3) | Al04-O00L | 1.890(3) |

**Supramolecular Force Table Statistics****Table S3** Hydrogen bond parameters for **AIOC-134**.

| D-H...A          | d(D-H) | d(H...A) | d(D...A)  | ∠(DHA) |
|------------------|--------|----------|-----------|--------|
| C01M-H01M...O00I | 0.95   | 2.43     | 2.758(6)  | 100    |
| C01S-H01S...O00Q | 0.95   | 2.47     | 2.785(7)  | 100    |
| C01X-H01X...O00N | 0.95   | 2.43     | 2.756(7)  | 100    |
| C02A-H02A...O00N | 0.99   | 2.44     | 3.059(8)  | 120    |
| C02A-H02B...O00Y | 0.99   | 2.58     | 2.919(7)  | 100    |
| C02O-H02O...O014 | 0.95   | 2.42     | 2.739(8)  | 100    |
| C02V-H02V...O00M | 0.95   | 2.36     | 2.691(8)  | 100    |
| C034-H03A...O00Y | 0.99   | 2.55     | 3.175(8)  | 121    |
| C039-H039...O018 | 0.95   | 2.46     | 2.779(9)  | 100    |
| C03G-H03K...O00J | 0.95   | 2.42     | 2.772(8)  | 102    |
| C03M-H03R...O0F  | 0.99   | 2.45     | 3.041(11) | 118    |
| C03M-H03S...O014 | 0.99   | 2.47     | 2.980(11) | 112    |
| C03P-H03V...O013 | 0.99   | 2.37     | 2.994(8)  | 120    |
| C04D-H04I...O00J | 0.99   | 2.49     | 3.110(11) | 120    |
| C04F-H04K...O00S | 0.99   | 2.4      | 2.948(11) | 114    |

|                  |      |      |           |     |
|------------------|------|------|-----------|-----|
| C04F-H04L...O017 | 0.99 | 2.48 | 3.078(13) | 118 |
| C04R-H04Z...O0D  | 0.99 | 2.58 | 3.288(13) | 129 |
| C04W-H6AA...O00P | 0.95 | 2.43 | 3.335(15) | 159 |

**Table S4** Hydrogen bond parameters for **AIOC-135**.

| D-H...A          | d(D-H) | d(H...A) | d(D...A) | ∠(DHA) |
|------------------|--------|----------|----------|--------|
| C00U-H00U...O00K | 0.93   | 2.41     | 2.831(6) | 100    |
| C018-H18...O00J  | 0.93   | 2.4      | 2.721(7) | 100    |

**Table S5** The  $\pi$ ... $\pi$  interaction of **AIOC-134** and **AIOC-135**.

| The $\pi$ ... $\pi$ interaction of <b>AIOC-134</b>                 |                                                                        |                                         |
|--------------------------------------------------------------------|------------------------------------------------------------------------|-----------------------------------------|
| Aromatic ring A                                                    | Aromatic ring B                                                        | Distance between A-B ring centroids (Å) |
| intermolecular $\pi$ - $\pi$ interaction                           |                                                                        |                                         |
| C02C, C035, C047, C0AA,<br>C05M, C05G                              | C028, C02L, C02Q, C02Y,<br>C039, C03X                                  | 4.13                                    |
| C04N, C021, C05E, C02X,<br>C03V, C03J                              | C03N, C04B, C04K, C05B,<br>C04L, C04W                                  | 4.54                                    |
| The $\pi$ ... $\pi$ interaction of <b>AIOC-135</b>                 |                                                                        |                                         |
| Aromatic ring A                                                    | Aromatic ring B                                                        | Distance between A-B ring centroids (Å) |
| Intramolecular $\pi$ - $\pi$ interaction                           |                                                                        |                                         |
| C00T(#5), C017(#6), C01L(#7),<br>C01E(#8), C002(#9), C01N(#10)     | C00T(#11), C017(#12),<br>C01L(#13), C01E(#14),<br>C002(#15), C01N(#16) | 4.56                                    |
| C00T(#5), C017(#6), C01L(#7),<br>C01E(#9), C002(#10),<br>C01N(#13) | C00T(#8), C017(#11),<br>C01L(#12), C01E(#14),<br>C002(#15), C01N(#16)  | 4.55                                    |
| Intermolecular $\pi$ - $\pi$ interaction                           |                                                                        |                                         |
| C6, C12, C01Z, C02Y, C02W,<br>C01X                                 | C00V, C018, C01C, C01G,<br>C01H, C01K                                  | 4.73                                    |
| C014, C02N, C02B, C02G,<br>C02X, C02R                              | C6, C12, C01Z, C02Y, C02W,<br>C01X                                     | 4.87                                    |

**Table S6** BVS analysis for **AIOC-134**.

| BVS Value   | Bond distances |          | BVS Value   | Bond distances |          |
|-------------|----------------|----------|-------------|----------------|----------|
| Al01 3.1819 | Al01-O09       | 1.862(3) | Al02 3.1363 | Al02-O0C       | 1.880(2) |
|             | Al01-O0C       | 1.875(3) |             | Al02-O0F       | 1.913(3) |
|             | Al01-O0E       | 1.882(3) |             | Al02-O0G       | 1.901(3) |
|             | Al01-O0K       | 1.915(3) |             | Al02-O0M       | 1.945(3) |
|             | Al01-O0N       | 1.907(3) |             | Al02-O0P       | 1.859(3) |
|             | Al01-O0P       | 1.872(3) |             | Al02-O0Q       | 1.853(3) |
| BVS Value   | Bond distances |          | BVS Value   | Bond distances |          |
| Al03 3.1595 | Al03-O09       | 1.847(3) | Al04 3.1265 | Al04-O0B       | 1.875(3) |
|             | Al03-O0A       | 1.853(3) |             | Al04-O0D       | 1.865(3) |
|             | Al03-O0J       | 1.873(3) |             | Al04-O0H       | 1.855(3) |
|             | Al03-O0X       | 1.946(3) |             | Al04-O0S       | 1.888(3) |
|             | Al03-O0Z       | 1.898(3) |             | Al04-O0Y       | 1.947(3) |
|             | Al03-O10       | 1.927(3) |             | Al04-O11       | 1.929(3) |
| BVS Value   | Bond distances |          | BVS Value   | Bond distances |          |
| Al05 3.2078 | Al05-O0H       | 1.860(3) | Al06 3.1501 | Al06-O0I       | 1.867(3) |
|             | Al05-O0I       | 1.865(3) |             | Al06-O0L       | 1.875(3) |
|             | Al05-O0L       | 1.884(3) |             | Al06-O0O       | 1.895(3) |
|             | Al05-O0T       | 1.885(3) |             | Al06-O0U       | 1.844(3) |
|             | Al05-O0W       | 1.913(3) |             | Al06-O12       | 1.912(3) |
|             | Al05-O017      | 1.887(3) |             | Al06-O013      | 1.949(3) |
| BVS Value   | Bond distances |          | BVS Value   | Bond distances |          |
| Al07 3.1787 | Al07-O0B       | 1.883(3) | Al08 3.2065 | Al08-O0A       | 1.868(3) |
|             | Al07-O0D       | 1.872(3) |             | Al08-O0J       | 1.873(3) |
|             | Al07-O0Q       | 1.855(3) |             | Al08-O0U       | 1.863(3) |
|             | Al07-O0R       | 1.886(3) |             | Al08-O0V       | 1.898(3) |
|             | Al07-O015      | 1.924(3) |             | Al08-O014      | 1.913(3) |
|             | Al07-O016      | 1.896(3) |             | Al08-O018      | 1.880(3) |

Bond valence =  $\exp((R_o - R)/B)$ , where  $R_o$  values for Al-O bond length is 1.644, B is 0.38. The ( $\mu_2$ -OH) are O0E, O0D, O0Z and O0L.

**Table S7** BVS analysis for **AIOC-135**.

| BVS Value   | Bond distances |          | BVS Value   | Bond distances |          |
|-------------|----------------|----------|-------------|----------------|----------|
| Al01 3.0394 | Al01-O005      | 1.884(2) | Al02 3.0969 | Al02-O005      | 1.890(3) |
|             | Al01-O006      | 1.923(3) |             | Al02-O006      | 1.910(3) |
|             | Al01-O008      | 1.913(3) |             | Al02-O007      | 1.864(3) |
|             | Al01-O00A      | 1.908(3) |             | Al02-O009      | 1.913(3) |
|             | Al01-O00C      | 1.897(4) |             | Al02-O00B      | 1.899(3) |
|             | Al01-O00E      | 1.891(3) |             | Al02-O00H      | 1.898(3) |
| BVS Value   | Bond distances |          | BVS Value   | Bond distances |          |
| Al03 3.1197 | Al03-O007      | 1.841(3) | Al04 3.2035 | Al04-O008      | 1.902(3) |
|             | Al03-O009      | 1.955(3) |             | Al04-O00D      | 1.838(3) |
|             | Al03-O00D      | 1.840(3) |             | Al04-O00E      | 1.909(3) |
|             | Al03-O00F      | 1.904(3) |             | Al04-O00J      | 1.909(4) |
|             | Al03-O00G      | 1.935(3) |             | Al04-O00K      | 1.853(3) |
|             | Al03-O00I      | 1.895(3) |             | Al04-O00L      | 1.890(3) |

Bond valence =  $\exp((R_o-R)/B)$ , where  $R_o$  values for Al-O bond length is 1.644, B is 0.38. The ( $\mu_2$ -OH) are O00D and O007.

### Sample (AIOCs@PDMS) Information and Third-order Test Parameters

**Table S8** Sample information and nonlinear optics parameters.

| Sample                                                 | AIOC-134 | AIOC-135 |
|--------------------------------------------------------|----------|----------|
| Linear transmittance                                   | 0.50     | 0.51     |
| Thickness (mm)                                         | 1.05     | 0.74     |
| OL threshold <sup>[a]</sup> (J/cm <sup>2</sup> )       | 3.98     | 0.62     |
| Nonlinear transmittance                                | 0.84     | 0.79     |
| $\beta$ <sup>[b]</sup> (cm/GW)                         | 22       | 41       |
| $\alpha$ <sup>[c]</sup> (cm <sup>-1</sup> )            | 6.60     | 9.10     |
| Im $\chi^{(3)}$ <sup>[d]</sup> (10 <sup>-12</sup> esu) | 4.65     | 8.66     |
| FOM <sup>[e]</sup> (10 <sup>-12</sup> esu)             | 0.70     | 0.95     |

[a] OL threshold is defined as the input fluency at which the transmittance is 50% of the linear transmittance; [b]  $\beta$  is the nonlinear absorption coefficient; [c]  $\alpha$  being the linear absorption coefficient at the laser wavelength; [d] Im  $\chi^{(3)}$  is third-order susceptibility  $\chi^{(3)}$  values; [e] FOM is the ratio of third-order susceptibility  $\chi^{(3)}$  and linear absorption coefficient at the laser wavelength.



Supplement of Representative NLO Material

Table S9 Comparison of Nonlinear Optics Parameters.

| Compounds                                                                                                                                                                                                                | Text Condition                     | $\alpha^{[a]}$<br>( $\text{cm}^{-1}$ ) | $\beta^{[b]}$<br>( $\text{cm}/\text{GW}$ ) | OL threshold <sup>[c]</sup><br>( $\text{J}/\text{cm}^2$ ) | Ref.      |
|--------------------------------------------------------------------------------------------------------------------------------------------------------------------------------------------------------------------------|------------------------------------|----------------------------------------|--------------------------------------------|-----------------------------------------------------------|-----------|
| Pt-Ni NP/reduced graphene oxide                                                                                                                                                                                          | in $\text{C}_2\text{H}_5\text{OH}$ | -                                      | 1.64                                       | 2.49<br>(in gel glass)                                    | 1         |
| Pt-Ni cluster/reduced graphene oxide                                                                                                                                                                                     | in $\text{C}_2\text{H}_5\text{OH}$ | -                                      | 1.98                                       | 1.42<br>(in gel glass)                                    | 1         |
| $[(n\text{BuSn})_{12}(\text{OH})_{23}\text{O}(\text{AgO}_4)]_2 \cdot 6(\text{Ac}) \cdot 2$<br>(PCA) $\cdot 7\text{CH}_3\text{CN}$<br>(Bu = butylgroup; HAc = aceticacid;<br>HPCA = 2-pyrazinecarboxylic acid)            | KBr pellet                         | -                                      | 2.55                                       | 0.50                                                      | 2         |
| graphene oxide                                                                                                                                                                                                           | in DMF                             | 5.13                                   | 6.19                                       | -                                                         | 3         |
| $(\text{Tp}^*\text{WS}_3\text{Cu}_3)_4(\mu_4\text{-S})_4(\text{Ag})\text{OTf} \cdot 0.33\text{CHCl}_3$<br>(OTf = $\text{CF}_3\text{SO}_3$ )                                                                              | PVBC film                          | -                                      | 18.00                                      | -                                                         | 4         |
| $(\text{Al}_{16}(\text{}^n\text{OPr})_{16}(\mu_2\text{-OH})_8(2\text{-NA})_{24})$ ( $\text{}^n\text{OPr}$ = n-propanol, 2-NA = 2-naphthoic acid)                                                                         | PDMS film                          | 6.60                                   | 22.00                                      | 3.98                                                      | This work |
| $[\text{Tp}^*\text{WS}_3\text{Cu}_2(\text{L}^a)]_6(\text{OTf})_6$<br>( $\text{Tp}^*$ = hydridotris(3,5-dimethylpyrazol-1-yl)borate, $\text{L}^a$ = 1,4-di(pyridin-4-yl)-buta-1,3-diyne, OTf = $\text{CF}_3\text{SO}_3$ ) | PVA film                           | -                                      | 26.00                                      | -                                                         | 5         |
| zinc phthalocyanine                                                                                                                                                                                                      | in DMF                             | 6.24                                   | 31.07                                      | -                                                         | 3         |
| $(\text{Al}_{16}(\text{phenol})_{20}(\mu_2\text{-OH})_8(2\text{-NA})_{20})$<br>(2-NA = 2-naphthoic acid)                                                                                                                 | PDMS film                          | 9.10                                   | 41.00                                      | 0.62                                                      | This work |
| $[(\text{Tp}^*\text{WS}_3\text{Cu}_3)_2(\text{Tp}^*_2\text{W}_2\text{Cu}_3\text{S}_7)_3](\text{PF}_6)$                                                                                                                   | PVBC film                          | -                                      | 45.00                                      | -                                                         | 4         |
| detonation nanodiamonds-2,9(10),16(17),23(24)-tetrakis-(4-pyridyloxy) phthalocyaninato                                                                                                                                   | in DMSO                            | 17.95                                  | 58.50                                      | -                                                         | 6         |
| single-walled carbon nanotube-5,10,15,20-tetraphenylporphyrin                                                                                                                                                            | in DMF                             | -                                      | 105.00                                     | -                                                         | 7         |
| detonation nanodiamonds- phthalocyanato silicon (IV) hydroxide                                                                                                                                                           | in DMSO                            | 1.73                                   | 125.00                                     | 0.47                                                      | 6         |
| reduced graphene oxide                                                                                                                                                                                                   | PMMA film                          | 24.59                                  | 129.01                                     | -                                                         | 8         |
| phthalocyanato silicon (IV) hydroxide                                                                                                                                                                                    | in DMSO                            | 2.59                                   | 136.00                                     | 0.39                                                      | 6         |
| poly[(9,9-dihexyl-9H-fluorene)-alt-(1,1,2,2-tetraphenylethene)]- reduced graphene oxide                                                                                                                                  | PMMA film                          | 12.19                                  | 215.77                                     | -                                                         | 8         |
| $[\text{Zn}_3(\text{TPyP})(\text{H}_2\text{O})_2(\text{C}_2\text{O}_4)_2]$<br>(TPyP( $\text{H}_2$ ) = 5,10,15,20-tetra(4-pyridyl)porphyrin)                                                                              | PDMS film                          | -                                      | 400.00                                     | 0.57                                                      | 9         |

|                                                                                                           |           |   |         |   |   |
|-----------------------------------------------------------------------------------------------------------|-----------|---|---------|---|---|
| [Zn <sub>2</sub> (TPyP)(AC) <sub>2</sub> ] (TPyP(H <sub>2</sub> ) = 5,10,15,20-tetra(4-pyridyl)porphyrin) | PDMS film | - | 1350.00 | - | 9 |
|-----------------------------------------------------------------------------------------------------------|-----------|---|---------|---|---|

The compounds are arranged in order of  $\beta$  value. [a]  $\alpha$  being the linear absorption coefficient at the laser wavelength; [b]  $\beta$  is the nonlinear absorption coefficient; [c] OL threshold defined as the input fluency at 50% linear transmittance.

## References

- 1 C. Zheng, L. Lei, J. Huang, W. Chen, W. Li, H. Wang, L. Huang and D. Huang, Facile control of metal nanoparticles from isolated nanoparticles to aggregated clusters on two-dimensional graphene to form optical limiters, *J. Mater. Chem. C*, 2017, **5**, 11579–11589.
- 2 Y. Zhu, Z. Wang, D. Li, Y. Zhu, Q. Li, D. Li and L. Zhang, Silver-Templated  $\gamma$ -Keggin Alkyltin-Oxo Cluster: Electronic Structure and Optical Limiting Effect, *Angew. Chem. Int. Ed.*, 2022, **61**, e202202853.
- 3 J. Zhu, Y. Li, Y. Chen, J. Wang, B. Zhang, J. Zhang and W. J. Blau, Graphene oxide covalently functionalized with zinc phthalocyanine for broadband optical limiting, *Carbon*, 2011, **49**, 1900–1905.
- 4 Z.-K. Wang, M.-H. Du, P. Braunstein and J.-P. Lang, A Cut-to-Link Strategy for Cubane-Based Heterometallic Sulfide Clusters with Giant Third-Order Nonlinear Optical Response, *J. Am. Chem. Soc.*, 2023, **145**, 9982–9987.
- 5 S.-J. Bao, Z.-M. Xu, Z.-W. Huang, T.-C. Yu, M.-Y. Wang, Y.-L. Song, Z. Niu, B. F. Abrahams and J.-P. Lang, A hierarchical supramolecular assembly strategy for remarkably amplifying third-order nonlinear optical responses of clusters, *Sci. China Mater.*, 2023, **66**, 3278–3284.
- 6 R. Matshitse, S. Khene and T. Nyokong, Photophysical and nonlinear optical characteristics of pyridyl substituted phthalocyanine-Detonation nanodiamond conjugated systems in solution, *Diam. Relat. Mater.*, 2019, **94**, 218–232.
- 7 Z.-B. Liu, J.-G. Tian, Z. Guo, D.-M. Ren, F. Du, J.-Y. Zheng and Y.-S. Chen, Enhanced Optical Limiting Effects in Porphyrin-Covalently Functionalized Single-Walled Carbon Nanotubes, *Adv. Mater.*, 2008, **20**, 511–515.
- 8 Z. Liu, N. Dong, P. Jiang, K. Wang, J. Wang and Y. Chen, Reduced Graphene Oxide Chemically Modified with Aggregation-Induced Emission Polymer for Solid-State Optical Limiter, *Chem. Eur. J.*, 2018, **24**, 19317–19322.
- 9 D.-J. Li, Q. Li, Z.-R. Wang, Z.-Z. Ma, Z.-G. Gu and J. Zhang, Interpenetrated Metal-Porphyrinic Framework for Enhanced Nonlinear Optical Limiting, *J. Am. Chem. Soc.*, 2021, **143**, 17162–17169.
